# Supplementary material
Source: PubMed Central journal article supplement (PMC2919916)
Supplement: 1004675107_pnas.201004675SI.pdf [file 1004675107_pnas.201004675SI.pdf]

# Supporting Information

Matsuura et al. 10.1073/pnas.1004675107

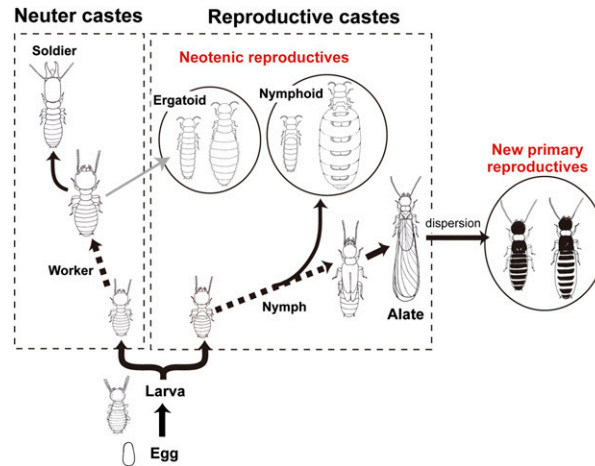

**Fig. S1.** Differentiation pathways of primary and secondary (neotenic) reproductives in *Reticulitermes* termites. Primary reproductives (queen and king) derive from alates and found new colonies. Nymphoid, neotenic reproductives differentiated from nymphs. Ergatoid, neotenic reproductives differentiated from workers.

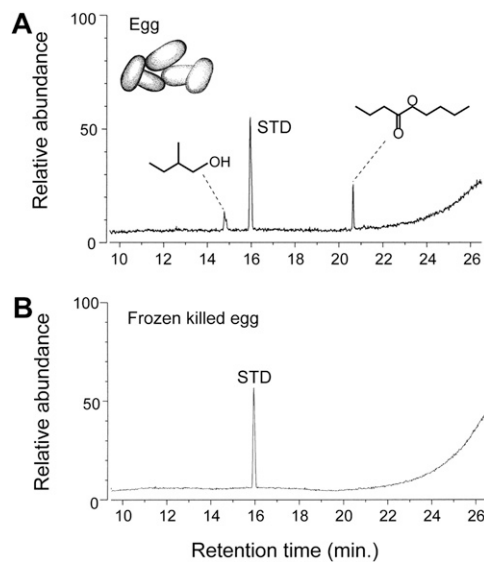

**Fig. S2.** (A) Chromatograms of headspace-collected volatiles of termite eggs. Egg volatiles consisted of n-butyl-n-butyrate and 2-methyl-1-butanol. STD, toluene as an internal standard. (B) Frozen-killed eggs showed no volatile emission.

**Table S1. List of royal composition of mature field colonies from which reproductives were successfully collected**

| Colony code | King        |             |       |             | Queen       |              |       |           |
|-------------|-------------|-------------|-------|-------------|-------------|--------------|-------|-----------|
|             | Primary     | Secondary   |       | Total       | Primary     | Secondary    |       | Total     |
|             |             | Nym.        | Erg.  |             |             | Nym.         | Erg.  |           |
| TA980526    | 1           | 0           | 0     | 1           | 0           | 13           | 0     | 13        |
| TA980604    | 1           | 0           | 0     | 1           | 0           | 22           | 0     | 22        |
| TA980809    | 1           | 0           | 0     | 1           | 0           | 21           | 0     | 21        |
| TB991016A   | 1           | 0           | 0     | 1           | 0           | 18           | 0     | 18        |
| TA000619    | 1           | 0           | 0     | 1           | 0           | 74           | 0     | 74        |
| KB000904A   | 1           | 0           | 0     | 1           | 0           | 25           | 0     | 25        |
| KB000907    | 1           | 0           | 0     | 1           | 0           | 31           | 0     | 31        |
| KB010703    | 1           | 0           | 0     | 1           | 0           | 67           | 0     | 67        |
| KB010725    | 1           | 0           | 0     | 1           | 0           | 109          | 0     | 109       |
| KB010728    | 0           | 0           | 0     | 0*          | 0           | 15           | 0     | 15        |
| IW010730    | 1           | 0           | 0     | 1           | 0           | 15           | 0     | 15        |
| U060712     | 1           | 0           | 0     | 1           | 1           | 128          | 0     | 129       |
| U060719     | 0           | 0           | 0     | 0*          | 0           | 45           | 0     | 45        |
| Y060730A    | 0           | 0           | 0     | 0*          | 0           | 37           | 0     | 37        |
| Y060730B    | 0           | 0           | 0     | 0*          | 0           | 25           | 0     | 25        |
| Y060731     | 1           | 0           | 0     | 1           | 0           | 29           | 0     | 29        |
| Y060802A    | 1           | 0           | 0     | 1           | 0           | 37           | 0     | 37        |
| Y060802B    | 1           | 0           | 0     | 1           | 0           | 38           | 0     | 38        |
| T0608007    | 0           | 0           | 0     | 0*          | 0           | 10           | 0     | 10        |
| Y060810B    | 1           | 0           | 0     | 1           | 0           | 80           | 0     | 80        |
| U060814     | 0           | 0           | 0     | 0*          | 0           | 4            | 0     | 4         |
| Y060815     | 0           | 0           | 0     | 0*          | 0           | 13           | 0     | 13        |
| Y060816     | 0           | 0           | 0     | 0*          | 0           | 365          | 0     | 365       |
| Y060901B    | 1           | 0           | 0     | 1           | 0           | 131          | 0     | 131       |
| T060905B    | 1           | 0           | 0     | 1           | 0           | 15           | 0     | 15        |
| U060912     | 1           | 0           | 0     | 1           | 0           | 70           | 0     | 70        |
| Y060930     | 1           | 0           | 0     | 1           | 0           | 49           | 0     | 49        |
| T070515     | 0           | 0           | 0     | 0*          | 0           | 68           | 0     | 68        |
| T070528A    | 0           | 1           | 0     | 1           | 0           | 28           | 0     | 28        |
| T080520A    | 0           | 1           | 0     | 1           | 0           | 78           | 0     | 78        |
| TA090501A   | 1           | 0           | 0     | 1           | 0           | 21           | 0     | 21        |
| OA090504A   | 1           | 0           | 0     | 1           | 0           | 15           | 0     | 15        |
| OA090610H   | 1           | 0           | 0     | 1           | 0           | 25           | 0     | 25        |
| KO090614B   | 1           | 0           | 0     | 1           | 0           | 10           | 0     | 10        |
| OU090619A   | 1           | 0           | 0     | 1           | 0           | 61           | 0     | 61        |
| TA090620B   | 1           | 0           | 0     | 1           | 0           | 5            | 0     | 5         |
| TA090620A   | 1           | 0           | 0     | 1           | 0           | 656          | 0     | 656       |
| TA090623B   | 1           | 0           | 0     | 1           | 0           | 73           | 0     | 73        |
| TK090624A   | 1           | 0           | 0     | 1           | 0           | 208          | 0     | 208       |
| TK090624B   | 1           | 0           | 0     | 1           | 0           | 36           | 0     | 36        |
| HA090626A   | 1           | 0           | 0     | 1           | 0           | 40           | 0     | 40        |
| SU090707A   | 1           | 0           | 0     | 1           | 0           | 14           | 0     | 14        |
| SU090710C   | 1           | 0           | 0     | 1           | 0           | 10           | 0     | 10        |
| NI090722A   | 1           | 0           | 0     | 1           | 0           | 39           | 0     | 39        |
| SU090727B   | 1           | 0           | 0     | 1           | 0           | 16           | 0     | 16        |
| U.K.090730A | 1           | 0           | 0     | 1           | 0           | 15           | 0     | 15        |
| GI090730B   | 1           | 0           | 0     | 1           | 0           | 103          | 0     | 103       |
| Total       | 36          | 2           | 0     | 38          | 1           | 3,007        | 0     | 3,008     |
| Mean (SE)   | 0.76 (0.11) | 0.04 (0.01) | 0 (0) | 0.81 (0.12) | 0.02 (0.00) | 63.98 (9.33) | 0 (0) | 64 (3.34) |

Nym., nymphoid; Erg., ergatoid. The colonies TK090624A and GI090730B were used for the chemical analysis.  
\*King was not collected, most likely because of collection error.
